# Supplementary material
Source: publisher figshare collection journal article supplement (https://tandf.figshare.com/articles/dataset/_/25245702)

# Supplementary material

## CDH1 gene as biomarker towards Breast cancer prediction

Srijan Banerjee, Antara Sengupta, Shankar Kumar Ghosh, Raja Banerjee

Figure S1: Percentage occurrence of different types of mutations with respect to total data set. (a) Percentage occurrence of different categories of mutations (b) Percentage occurrence of different types of breast cancers.

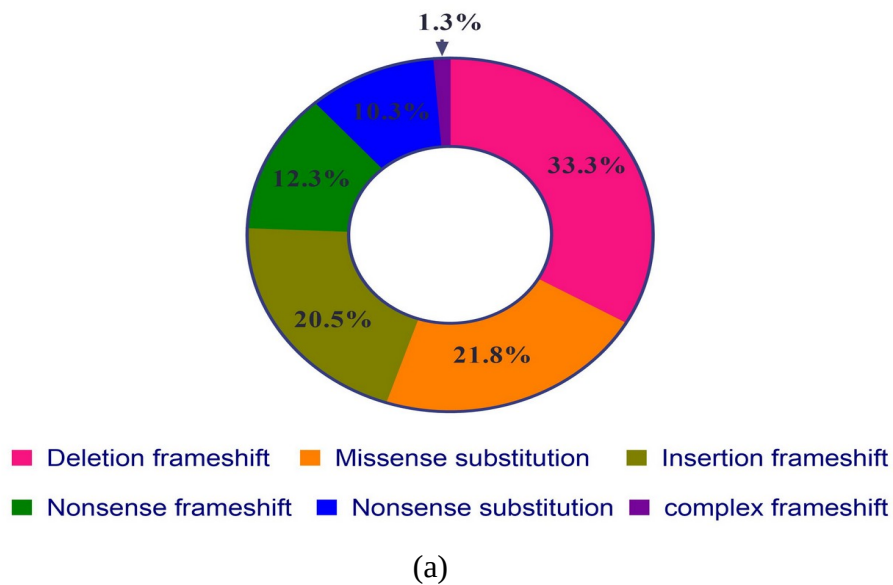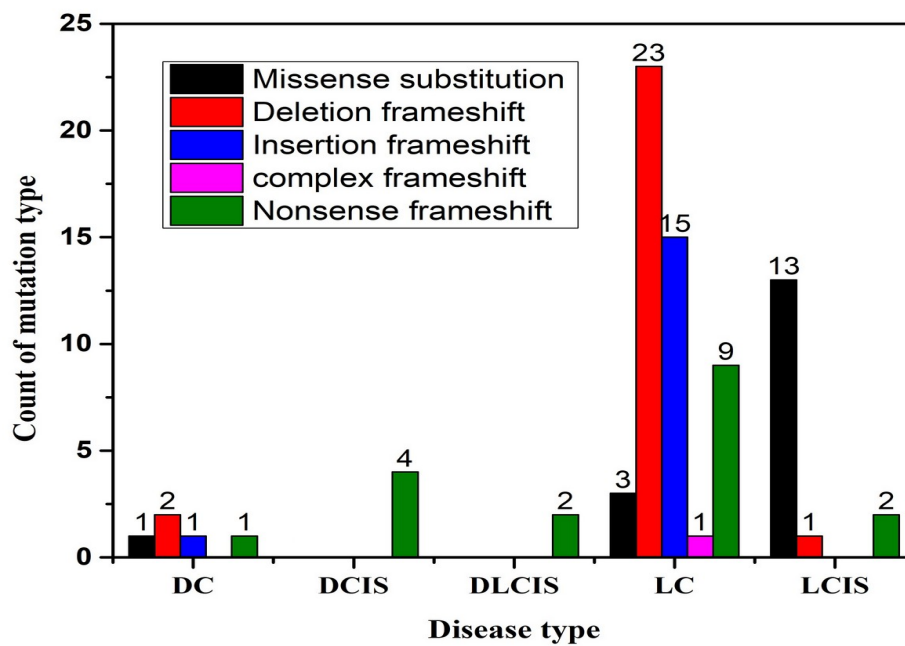

Fig S2: Example of pair wise alignments of normal and diseased proteins.

CDH1\_DCIS\_997949\_1\_P    AVEDPMEILITVTDQNDNK**L**EFTQEVFKGS/MEGALPGTSVMEVTATDADDDVNTYNAAI 300

NORMAL                    AVEDPMEILITVT**D**QNDNK**P**EFTQEVFKGS/MEGALPGTSVMEVTATDADDDVNTYNAAI 300

Fig S3: Barplot of highest and lowest leave one out accuracy of each classification strategies.

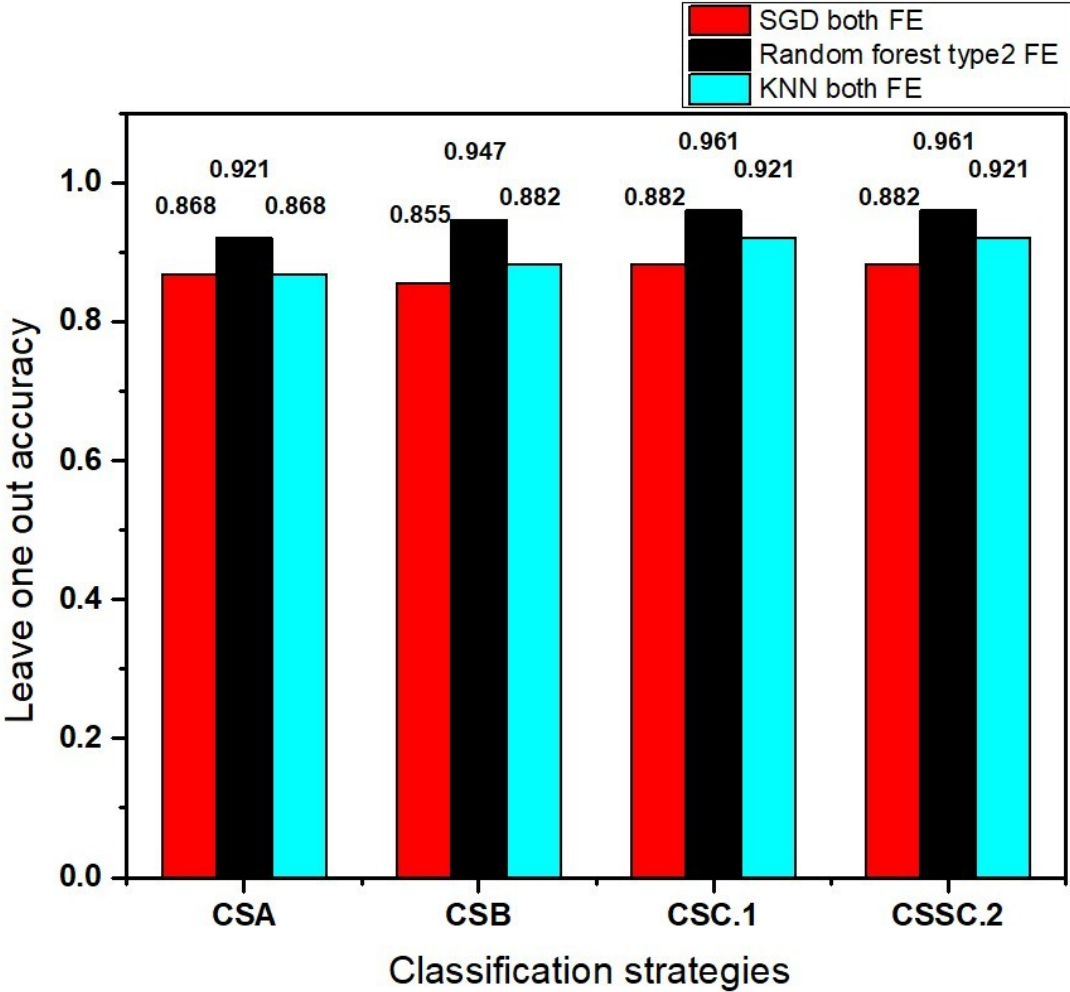

Supplement: Supplementary file 1 [file 1]
